# Supplementary material for: Overview of Ecology and Aspects of Antibiotic Resistance in Campylobacter spp. Isolated from Free-Grazing Chicken Tissues in Rural Households
Source: MDPI journal article supplement (doi:10.3390/microorganisms12020368), 2024-02-10
Supplement: s1 [file s1]

| Antibiotic agent                          | Disk code | Disk Concentration | Cut-ff criteria interpretation in diameter of inhibition zone in millimeter (mm) <sup>a</sup> |                         |                        |
|-------------------------------------------|-----------|--------------------|-----------------------------------------------------------------------------------------------|-------------------------|------------------------|
|                                           |           |                    | Resistant strain (R)                                                                          | Intermediate strain (I) | Susceptible strain (S) |
| Ampicillin                                | AMP-10    | 10 µg              | ≤ 13                                                                                          | 14-16                   | ≥ 17                   |
| Amoxicillin-clavulanic acid               | AMC-10    | 20/10 µg           | ≤ 13                                                                                          | 14-17                   | ≥ 18                   |
| Ciprofloxacin                             | CIP-5     | 5 µg               | < 26                                                                                          | -                       | ≥ 26                   |
| Nalidixic acid                            | NAL-30    | 30 µg              | ≤ 13                                                                                          | 14-18                   | ≥ 19                   |
| chloramphenicol                           | CHL-30    | 30 µg              | ≤ 12                                                                                          | 13-17                   | ≥ 18                   |
| Erythromycin ( <i>C. jejuni</i> )         | ERY -15   | 15 µg              | < 20                                                                                          | -                       | ≥ 20                   |
| Erythromycin ( <i>C. coli</i> )           | ERY -15   | 15 µg              | < 20                                                                                          | -                       | ≥ 20                   |
| Gentamicin                                | GEN -10   | 10 µg              | ≤ 12                                                                                          | 13-14                   | ≥ 15                   |
| Tetracycline                              | TER- 30   | 30 µg              | < 30                                                                                          | -                       | ≥ 30                   |
| Streptomycin                              | STM-10    | 10 µg              | ≤ 11                                                                                          | 13-14                   | ≥ 15                   |
| Trimethoprim /sulfamethoxazole            | SUT -25   | 23,75/1,25 µg      | ≤ 10                                                                                          | 11-15                   | ≥ 16                   |
| Cephalosporins                            |           |                    |                                                                                               |                         |                        |
| Cephalothin (1 <sup>th</sup> generation ) | CFL-30    | 30 µg              | ≤ 14                                                                                          | 15-17                   | ≥ 18                   |
| Cefuroxime (2 <sup>th</sup> generation )  | CFU-30    | 30 µg              | ≤ 14                                                                                          | 15-17                   | ≥ 18                   |
| Cefotaxime (3 <sup>th</sup> generation )  | CFT-30    | 30 µg              | ≤ 22                                                                                          | 23-25                   | ≥ 26                   |
| Cefepime (4 <sup>th</sup> generation)     | CFE-30    | 30 µg              | ≤ 14                                                                                          | 15-17                   | ≥ 18                   |

**S 2.** Interpretation criteria /cut-off values. used to characterize the antibiotic resistance pattern of *Campylobacter* isolates. Interpretation values according to EUCAST 2023 & CLSI, 2012 & 2021 for Enterobacterales [28-30].
