# Supplementary figures and images for: Overview of Ecology and Aspects of Antibiotic Resistance in Campylobacter spp. Isolated from Free-Grazing Chicken Tissues in Rural Households
Source: MDPI journal article supplement (doi:10.3390/microorganisms12020368), 2024-02-10

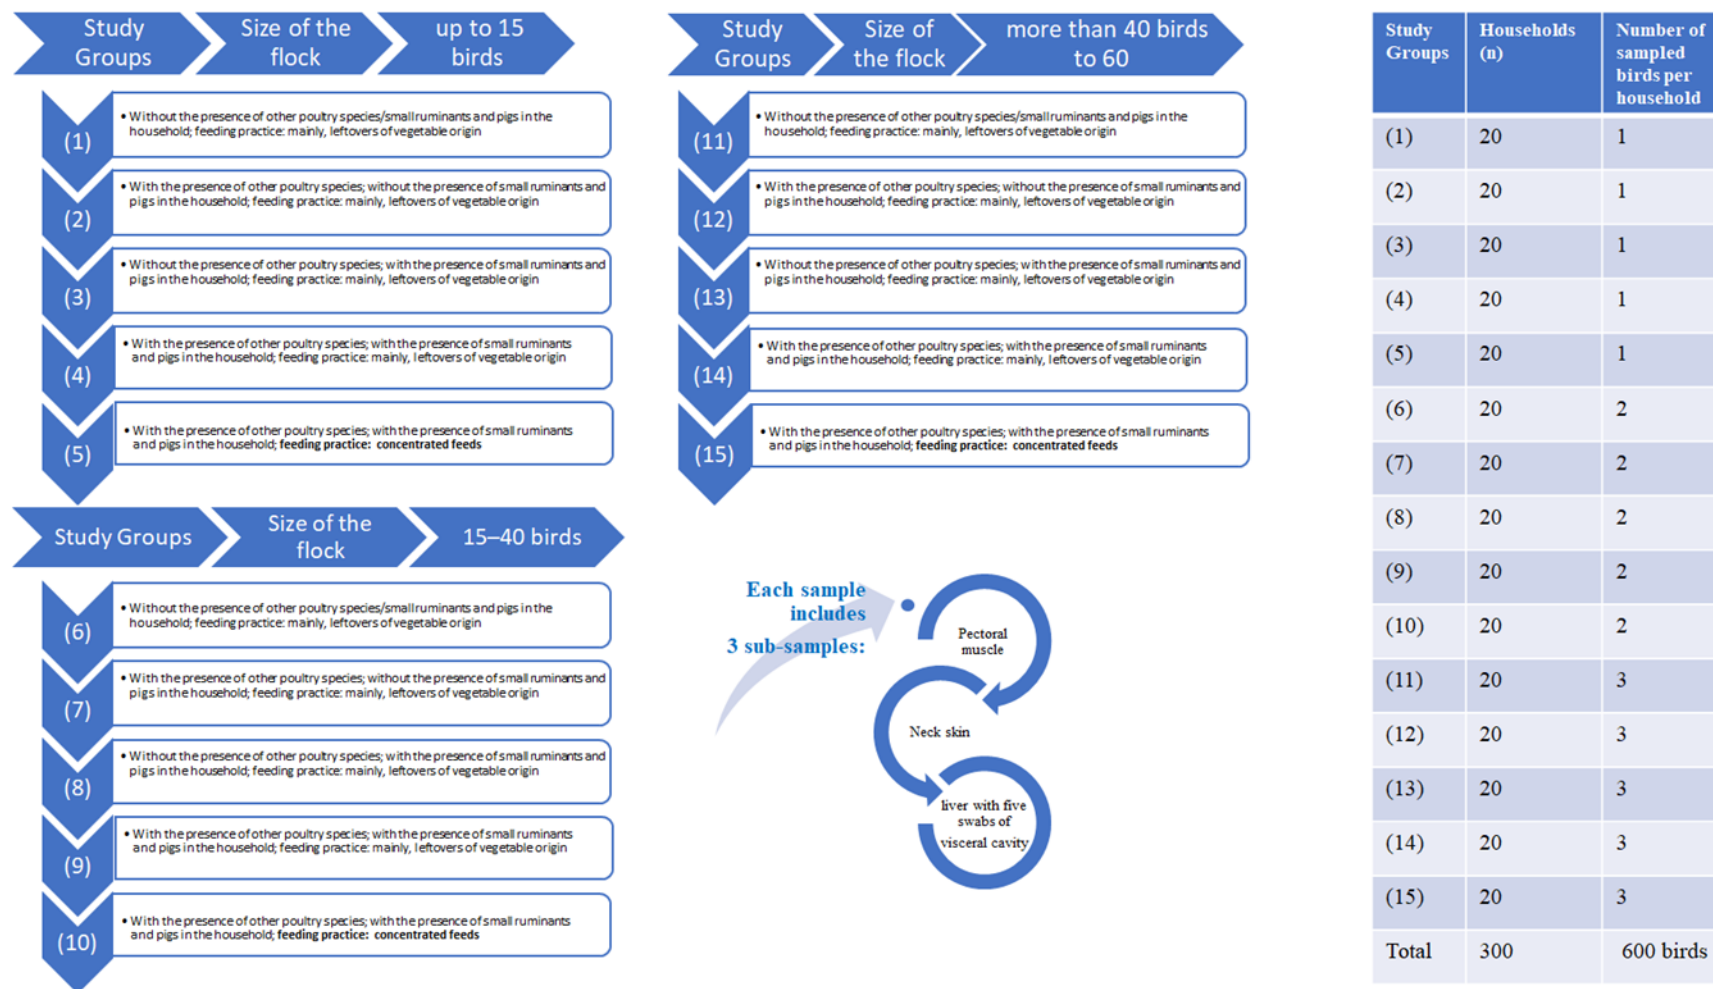

**S 1:** Sampling size and groups formed according the four criteria of the study

Supplement: s1 [file s1]
